# Supplementary material for: Synthesis, characterization and optical properties of π-conjugated systems incorporating closo-dodecaborate clusters: new potential candidates for two-photon absorption processes
Source: Royal Society of Chemistry journal article supplement (doi:10.1039/b504414f), 2005-01-01
Supplement: b504414f1.pdf [file b504414f1.pdf]

## Supplementary data

### Synthesis, characterization and optical properties of $\pi$ -conjugated systems incorporating *closo*-dodecaborate clusters: new potential candidates for two-photon absorption processes

R. Bernard <sup>a</sup>, D. Cornu <sup>a,\*</sup>, P. L. Baldeck <sup>b</sup>, J. Čáslavský <sup>c</sup>, J.-M. Létoffé <sup>a</sup>, J.-P. Scharff <sup>a</sup> and P. Miele <sup>a</sup>

a. *Laboratoire des Multimatériaux et Interfaces*

*UMR CNRS 5615 – Université Claude Bernard Lyon I*

*43 Bd du 11 Novembre 1918, F69622 Villeurbanne cedex, France*

[David.Cornu@univ-lyon1.fr](mailto:David.Cornu@univ-lyon1.fr)

b. *Laboratoire de Spectrométrie Physique*

*UMR CNRS 5588 – Université Joseph Fourier*

*140 Avenue de la Physique - BP 87, F-38402 Saint Martin d'Hères, France*

c. *Institute of Analytical Chemistry*

*Czech Academy of Sciences, Veveří 97, 611 42 Brno, Czech Republic*

#### Synthesis of NC-C<sub>6</sub>H<sub>4</sub>-C(H)=N-CH<sub>3</sub> (**5**)

In a typical experiment, 1.30g (0.01mol) of 4-cyanobenzaldehyde are added at r.t. to a large molar excess of an aqueous solution of methylamine (40 wt %). The mixture is kept under stirring during 12h then the title compound was extracted from the aqueous media with diethylether. NC-C<sub>6</sub>H<sub>4</sub>-C(H)=N-CH<sub>3</sub> (1.14g, 80%) was crystallized from the extracted solution by a slow evaporation of the solvent (Found: C, 74.79; H, 5.44; N, 19.44%. **5** requires C, 74.98; H, 5.59; N, 19.43%).  $\delta_{\text{H}}$  (CD<sub>3</sub>CN) 3.14 (s, 3H, NCH<sub>3</sub>), 7.80 (d, 2H, C<sub>6</sub>H<sub>4</sub>), 7.90 (d, 2H, C<sub>6</sub>H<sub>4</sub>), 8.38 (s, 1H, N=CH);  $\delta_{\text{C}}$  (CD<sub>2</sub>Cl<sub>2</sub>) 48.52 (1C, N-CH<sub>3</sub>), 114.10 (1C, CN), 118.91 (1C, NC-C<sub>6</sub>H<sub>4</sub>), 128.94 (2C, C<sub>6</sub>H<sub>4</sub>), 132.40 (2C, C<sub>6</sub>H<sub>4</sub>) 140.67 (1C, HC-C<sub>6</sub>H<sub>4</sub>), 160.82 (1C, N=CH). DSC analysis: mp 58°C, bp 240°C.
