# Supplementary material for: Synthesis, characterization and optical properties of π-conjugated systems incorporating closo-dodecaborate clusters: new potential candidates for two-photon absorption processes
Source: Royal Society of Chemistry journal article supplement (doi:10.1039/b504414f), 2005-01-01

## Supplementary data

### Synthesis, characterization and optical properties of $\pi$ -conjugated systems incorporating *closo*-dodecaborate clusters: new potential candidates for two-photon absorption processes

R. Bernard <sup>a</sup>, D. Cornu <sup>a,\*</sup>, P. L. Baldeck <sup>b</sup>, J. Čáslavský <sup>c</sup>, J.-M. Létoffé <sup>a</sup>, J.-P. Scharff <sup>a</sup> and P. Miele <sup>a</sup>

a. *Laboratoire des Multimatériaux et Interfaces*

*UMR CNRS 5615 – Université Claude Bernard Lyon I*

*43 Bd du 11 Novembre 1918, F69622 Villeurbanne cedex, France*

[David.Cornu@univ-lyon1.fr](mailto:David.Cornu@univ-lyon1.fr)

b. *Laboratoire de Spectrométrie Physique*

*UMR CNRS 5588 – Université Joseph Fourier*

*140 Avenue de la Physique - BP 87, F-38402 Saint Martin d'Hères, France*

c. *Institute of Analytical Chemistry*

*Czech Academy of Sciences, Veveří 97, 611 42 Brno, Czech Republic*

### Fluorescence emission spectrum of MSB

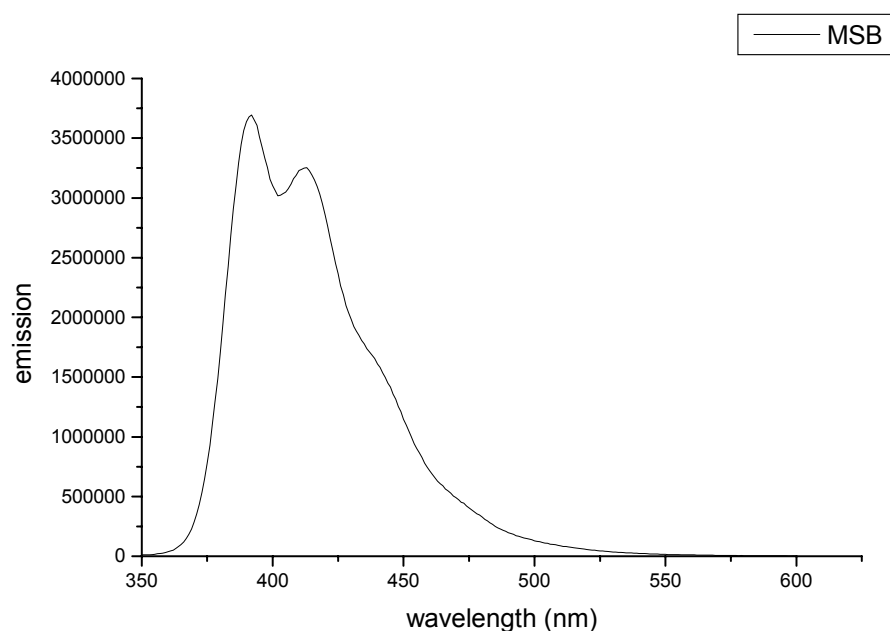

**Fluorescence emission spectra of  $[\text{NC-C}_6\text{H}_4\text{-C(H)=C(H)-C}_6\text{H}_4\text{-C(H)=N(H)-B}_{12}\text{H}_{11}]^-$  (3)  
and  $\text{NC-C}_6\text{H}_4\text{-C(H)=C(H)-C}_6\text{H}_4\text{-C(H)=N-CH}_3$  (6)**

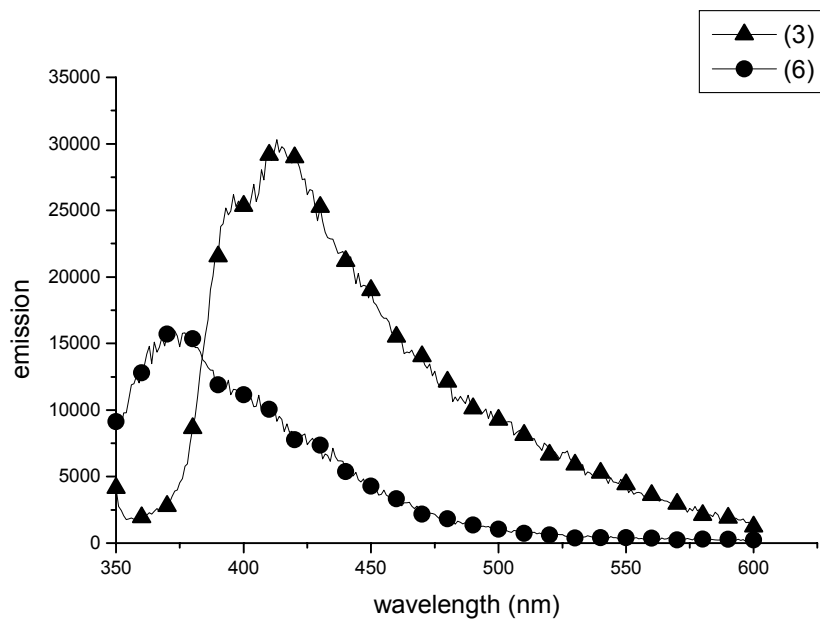

**Normalized fluorescence emission spectra of MSB, 3, and 6**

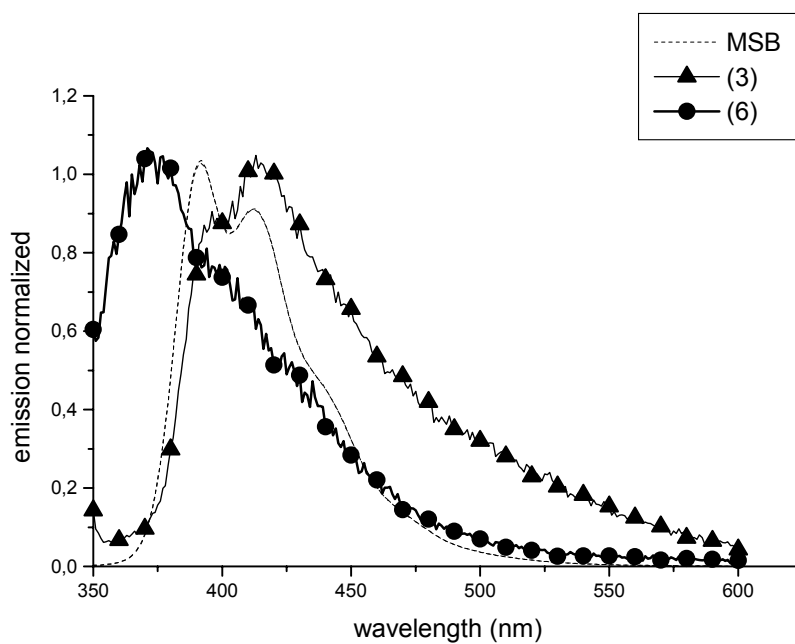

Supplement: b504414f2.pdf [file b504414f2.pdf]
